## Appendix A: Simplifying and rescaling the well-mixed model

The total amount of substrate  $\Sigma \equiv S + P + B + A$  obeys the differential equation  $d\Sigma/dt = I_S + I_P - \delta\Sigma$ , and so  $\Sigma$  converges to  $\Sigma^* = (I_S + I_P)/\delta$ . For studying the long-term dynamics of the model we can therefore assume that  $\Sigma$  has converged to the limiting value, so that  $S \equiv \Sigma^* - (P + B + A)$ . Also,  $A$  and  $B$  are produced in the constant ratio  $\alpha : (1 - \alpha)$  and have the same proportional loss rate  $\delta$ , so the ratio of  $A : B$  converges to  $c = \alpha/(1 - \alpha)$ . This allows us to write  $A = cB$ , leaving only  $P$  and  $B$  as state variables. The model is then

$$\begin{aligned} \frac{dB}{dt} &= \frac{(1 - \alpha)r_B BS}{K + S} - \delta B \\ \frac{dP}{dt} &= I_P + \frac{r_P e^{-\lambda c B} PS}{K + S} - \delta P \end{aligned} \quad (1)$$

with  $S = \Sigma^* - (P + (1 + c)B)$ ,  $c = \alpha/(1 - \alpha)$ .

To nondimensionalize the model, we rescale the state variables and time as follows:

$$x = (1 + c)B/\Sigma^*, y = P/\Sigma^*, \tau = \delta t. \quad (2)$$

Note that in this rescaling,  $x$  represents the total amount of substrate (relative to  $\Sigma^*$ ) in beneficials and antibiotic. By standard calculations, these rescalings convert (1) into equation (8) of the main text with scaled parameters

$$r_x = (1 - \alpha)r_B/\delta, r_y = r_P/\delta, \gamma = \lambda\alpha\Sigma^*, k = K/\Sigma^*, I_y = I_P/(I_S + I_P). \quad (3)$$
